# Supplementary material
Source: HighWire-hosted journal article supplement (https://www.cmajopen.ca/highwire/filestream/84915/field_highwire_adjunct_files/3/2019-0194-COREQ-Reporting-guideline-checklist.pdf)
Supplement: 2019-0194-COREQ-Reporting-guideline-checklist.pdf [file 2019-0194-COREQ-Reporting-guideline-checklist.pdf]

**Table 1**  
 Consolidated criteria for reporting qualitative studies (COREQ): 32-item checklist

| No                                             | Item                                     | PAGE NUMBER |
|------------------------------------------------|------------------------------------------|-------------|
| <b>Domain 1: Research team and reflexivity</b> |                                          |             |
| Personal Characteristics                       |                                          |             |
| 1.                                             | Interviewer/facilitator                  | 5           |
| 2.                                             | Credentials                              | 1           |
| 3.                                             | Occupation                               | 1           |
| 4.                                             | Gender                                   | 1           |
| 5.                                             | Experience and training                  | 1           |
| Relationship with participants                 |                                          |             |
| 6.                                             | Relationship established                 | 5           |
| 7.                                             | Participant knowledge of the interviewer | 5           |
| 8.                                             | Interviewer characteristics              | 5           |
| <b>Domain 2: study design</b>                  |                                          |             |
| Theoretical framework                          |                                          |             |
| 9.                                             | Methodological orientation and Theory    | 5           |
| Participant selection                          |                                          |             |

| <b>No</b>                               | <b>Item</b>                  | <b>PAGE NUMBER</b> |
|-----------------------------------------|------------------------------|--------------------|
| 10.                                     | Sampling                     | 5                  |
| 11.                                     | Method of approach           | 5                  |
| 12.                                     | Sample size                  | 6                  |
| 13.                                     | Non-participation            | 6                  |
| <b>Setting</b>                          |                              |                    |
| 14.                                     | Setting of data collection   | 6                  |
| 15.                                     | Presence of non-participants | 6                  |
| 16.                                     | Description of sample        | 6                  |
| <b>Data collection</b>                  |                              |                    |
| 17.                                     | Interview guide              | 5                  |
| 18.                                     | Repeat interviews            | N/A                |
| 19.                                     | Audio/visual recording       | 5                  |
| 20.                                     | Field notes                  | 5                  |
| 21.                                     | Duration                     | 6                  |
| 22.                                     | Data saturation              | N/A                |
| 23.                                     | Transcripts returned         | 5                  |
| <b>Domain 3: analysis and findingsz</b> |                              |                    |

| <b>No</b>     | <b>Item</b>                    | <b>PAGE<br/>NUMBER</b> |
|---------------|--------------------------------|------------------------|
| Data analysis |                                |                        |
| 24.           | Number of data coders          | 5                      |
| 25.           | Description of the coding tree | 5                      |
| 26.           | Derivation of themes           | 5                      |
| 27.           | Software                       | 5                      |
| 28.           | Participant checking           | 5                      |
| Reporting     |                                |                        |
| 29.           | Quotations presented           | Table 4                |
| 30.           | Data and findings consistent   | 7                      |
| 31.           | Clarity of major themes        | 6                      |
| 32.           | Clarity of minor themes        | 6                      |
